# Supplementary material for: Metabolomics Assessment of Volume Overload-Induced Heart Failure and Oxidative Stress in the Kidney
Source: MDPI journal article supplement (doi:10.3390/metabo13111165), 2023-11-20
Supplement: s1 [file s1]

## Supplementary Information

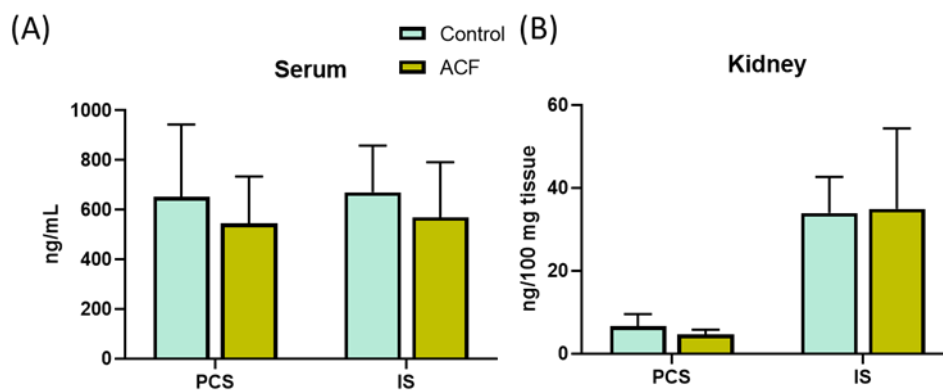

**Scheme 1.** Levels of p-cresol sulfate (PCS) and indoxyl sulfate (IS) in plasma (A) and kidney (B). Samples were analyzed by LC-TQ mass spectrometry in control (n = 7) and ACF rats (n = 5) after surgery. Data are reported as mean  $\pm$  SEM. Differences between the two groups were determined by the Mann-Whitney U test.

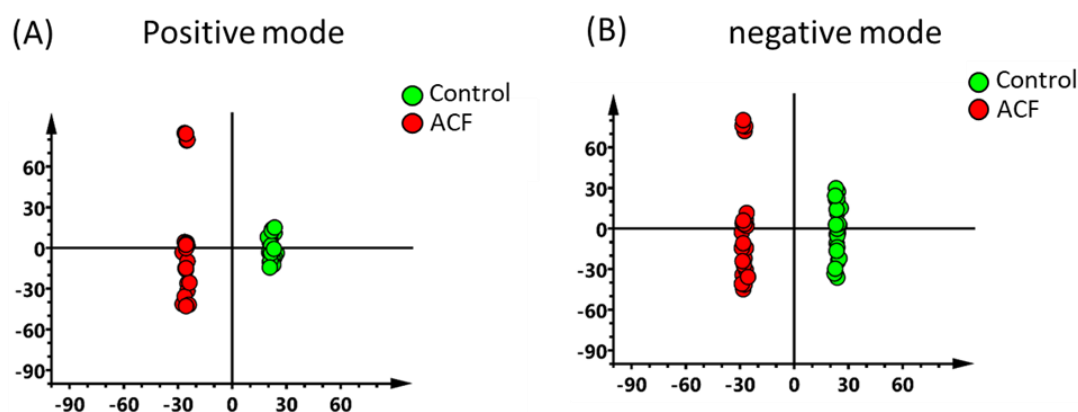

**Scheme 2.** Scores plot from the multivariate OPLS-DA model in positive (A) and negative mode (B). Features of the scores plot include the excellent discrimination between the ACF and control groups.

**Table S1.** The identified metabolites in ESI positive and ESI negative mode.

| ESI positive | Metabolites        | Adduct | m/z     | Retention time | Identification |
|--------------|--------------------|--------|---------|----------------|----------------|
| 1            | Carnitine          | M+H    | 162.113 | 3.295          | Lab standard   |
| 2            | Acetylcarnitine    | M+H    | 204.122 | 2.7604         | Lab standard   |
| 3            | Phosphocholine     | M+H    | 184.074 | 4.7828         | HMDB           |
| 4            | Adenosine          | M+H    | 268.104 | 3.4486         | Lab standard   |
| 5            | Betaine            | M+H    | 118.087 | 3.6662         | Lab standard   |
| 6            | Taurine            | M+H    | 126.023 | 4.0957         | Lab standard   |
| 7            | NAD                | M+H    | 664.116 | 5.5022         | Lab standard   |
| 8            | Creatine           | M+H    | 132.077 | 3.7148         | Lab standard   |
| 9            | Guanine            | M+H    | 152.057 | 3.8644         | Lab standard   |
| 10           | Propionylcarnitine | M+H    | 218.139 | 2.4975         | HMDB           |

|              |                              |          |         |        |              |
|--------------|------------------------------|----------|---------|--------|--------------|
| 11           | Choline                      | M+H      | 104.108 | 2.0194 | Lab standard |
| 12           | Hydroxyisovaleroyl carnitine | M+H      | 262.165 | 2.911  | HMDB         |
| 13           | Anserine                     | M+H      | 241.129 | 4.9764 | Lab standard |
| 14           | Deoxycytidine                | M+H      | 228.099 | 3.851  | HMDB         |
| 15           | 3-Methylhistidine            | M+H      | 170.092 | 5.0313 | HMDB         |
| 16           | Methylaspartic acid          | M+H      | 148.061 | 4.1864 | HMDB         |
| 17           | Tryptophan                   | Fragment | 188.071 | 3.4472 | Lab standard |
| 18           | Cytosine                     | M+H      | 112.051 | 4.1777 | HMDB         |
| 19           | 5'-Methylthioadenosine       | M+H      | 298.097 | 2.8832 | HMDB         |
| ESI negative |                              |          |         |        |              |
| 1            | Inosine                      | M-H      | 267.072 | 3.487  | Lab standard |
| 2            | AMP                          | M-H      | 346.053 | 5.015  | Lab standard |
| 3            | Pyroglutamic acid            | M-H      | 128.034 | 2.508  | Lab standard |
| 4            | Xanthine                     | M-H      | 151.024 | 3.310  | Lab standard |
| 5            | Glucuronolactone             | M-H      | 175.022 | 2.600  | HMDB         |
| 6            | Tyrosine                     | M-H      | 180.066 | 3.875  | Lab standard |
| 7            | Succinyladenosine            | M-H      | 382.098 | 3.406  | HMDB         |
| 8            | Malic acid                   | M-H      | 133.013 | 2.673  | Lab standard |
| 9            | Gluconic acid                | M-H      | 195.049 | 4.057  | HMDB         |
| 10           | Glutamate                    | M-H      | 146.044 | 4.313  | Lab standard |
| 11           | Uric acid                    | M-H      | 167.020 | 3.986  | Lab standard |
| 12           | Glucose 6-phosphate          | M-H      | 259.021 | 5.370  | Lab standard |
| 13           | Ascorbic acid-2-sulfate      | M-H      | 254.980 | 2.129  | HMDB         |
| 14           | Cholic acid                  | M-H      | 407.279 | 2.375  | Lab standard |
| 15           | Glucose                      | M-H      | 179.055 | 4.171  | Lab standard |
| 16           | S-Adenosylhomocysteine       | M-H      | 383.113 | 4.893  | Lab standard |
| 17           | 3,4-Dihydroxybutyric acid    | M-H      | 119.035 | 4.831  | HMDB         |
| 18           | 5-Glutamyl-taurine           | M-H      | 253.048 | 4.742  | HMDB         |
| 19           | Phosphoethanolamine          | M-H      | 140.011 | 4.892  | Lab standard |
| 20           | N-Acetylglutamine            | M-H      | 187.072 | 2.939  | HMDB         |
| 21           | Tyrosol 4-sulfate            | M-H      | 217.016 | 2.246  | HMDB         |

## Methods

Determine the levels of p-cresyl sulfate and indoxyl sulfate in rat plasma and kidney tissue using UPLC-triple quadrupole mass spectrometry (TQ-MS)

For the analysis of uremic toxins, 100  $\mu$ L of plasma was extracted with 200  $\mu$ L of acetonitrile containing 0.1% formic acid. The mixture was vortexed for 30 seconds and sonicated for 15 min on an ice bath to ensure thorough mixing. Following centrifugation at 12,000 g for 30 min at 4°C, the supernatant was transferred to another microtube. The remaining pellet was extracted again with 200  $\mu$ L of 50% methanol containing 0.1% formic acid and following the same procedure. Both the methanolic supernatant and acetonitrile supernatant were combined and dried under a stream of nitrogen gas. For the analysis of kidney tissue, the protocol was the same as the hydrophilic metabolic extraction.

Prior to analysis, both plasma and tissue samples were dissolved in 200  $\mu$ L of 50% acetonitrile and centrifuged at 12,000 g for 30 min. The clear supernatant was collected for UPLC-TQ-MS analysis. Tandem mass spectrometry was performed using a Xevo TQS MS system (Waters Corp., Milford, USA). Separation was achieved on a reversed-phase Acquity UPLC HSS T3 C18 column (2.1  $\times$  100 mm, 1.8  $\mu$ m) at 35  $^{\circ}$ C using eluent A (water with 0.1% formic acid) and eluent B (acetonitrile with 0.1% formic acid) in a gradient profile: 1% B for 0.5 min, increasing to 40% B within 0.5 min, and kept for 1.5 min, then increased to 99% B for 1 min, and finally re-equilibrated for 2 min at 1% B. The flow rate was 350  $\mu$ L/min. MS was performed in negative-ion multiple-reaction-monitoring (MRM) mode. Single analyte standards were dissolved in a mixture of water/methanol 50:50 (v/v) and were then infused at a flow rate of 10  $\mu$ L/min for tuning purposes. The major MS/MS fragment patterns of each analyte were determined. The optimized parameters were as follows: the capillary was set at 1500 V, the cone voltage was set at 30 V and the cone gas flow was 150 L/h, the source temperature was set at 150  $^{\circ}$ C. The desolvation gas flow was set at 1000 L/h at a temperature of 500  $^{\circ}$ C. The mixed quality control (QC) samples were analyzed during the analytical runs after every 10th sample. Data were collected and processed using Masslynx software (version 4.0).
